# Supplementary material for: Effect of Solid Fat Content in Fat Droplets on Creamy Mouthfeel of Acid Milk Gels
Source: MDPI journal article supplement (doi:10.3390/foods11192932), 2022-09-20
Supplement: s1 [file s1]

**Table S1.** Fatty acid composition of blended milk fats.

| Fatty acid (%)                 | F10                       | F20                       | F40                       | F60                       | F85                       |
|--------------------------------|---------------------------|---------------------------|---------------------------|---------------------------|---------------------------|
| Butyric acid(C4:0)             | 0.246±0.006 <sup>c</sup>  | 0.236±0.002 <sup>c</sup>  | 0.160±0.007 <sup>b</sup>  | 0.366±0.008 <sup>d</sup>  | 0.084±0.003 <sup>a</sup>  |
| Caproic acid(C6:0)             | 0.302±0.021 <sup>b</sup>  | 0.271±0.000 <sup>b</sup>  | 0.469±0.027 <sup>d</sup>  | 0.413±0.021 <sup>c</sup>  | 0.096±0.003 <sup>a</sup>  |
| Octanoic acid(C8:0)            | 0.215±0.005 <sup>b</sup>  | 0.227±0.001 <sup>b</sup>  | 0.395±0.025 <sup>d</sup>  | 0.359±0.003 <sup>c</sup>  | 0.089±0.001 <sup>a</sup>  |
| Capric acid(C10:0)             | 0.576±0.038 <sup>b</sup>  | 0.649±0.002 <sup>c</sup>  | 1.112±0.046 <sup>d</sup>  | 1.045±0.002 <sup>d</sup>  | 0.194±0.013 <sup>a</sup>  |
| Undecanoic acid(C11:0)         | 0.073±0.004 <sup>a</sup>  | N.D.                      | N.D.                      | N.D.                      | N.D.                      |
| Lauric acid(C12:0)             | 0.903±0.004 <sup>b</sup>  | 1.034±0.002 <sup>c</sup>  | 1.728±0.011 <sup>c</sup>  | 1.687±0.000 <sup>d</sup>  | 0.367±0.023 <sup>a</sup>  |
| Tridecanoic acid(C13:0)        | 0.031±0.001 <sup>c</sup>  | 0.024±0.001 <sup>b</sup>  | 0.047± 0.002 <sup>d</sup> | 0.048±0.003 <sup>d</sup>  | 0.019±0.001 <sup>a</sup>  |
| Tetradecanoic acid (C14:0)     | 3.267±0.038 <sup>b</sup>  | 3.693±0.001 <sup>c</sup>  | 6.000±0.015 <sup>d</sup>  | 6.127±0.003 <sup>c</sup>  | 1.968±0.029 <sup>a</sup>  |
| Myristoleic acid(C14:1n5)      | 0.257±0.007 <sup>b</sup>  | 0.278±0.001 <sup>c</sup>  | 0.471±0.011 <sup>d</sup>  | 0.465±0.008 <sup>d</sup>  | 0.084±0.002 <sup>a</sup>  |
| Pentadecanoic acid (C15:0)     | 0.335±0.001 <sup>b</sup>  | 0.364±0.003 <sup>c</sup>  | 0.601± 0.002 <sup>d</sup> | 0.609±0.013 <sup>d</sup>  | 0.167±0.004 <sup>a</sup>  |
| Cetylic acid (C16:0)           | 17.888±0.032 <sup>a</sup> | 27.994±0.021 <sup>b</sup> | 36.639±0.090 <sup>c</sup> | 43.886±0.032 <sup>d</sup> | 54.146±0.317 <sup>c</sup> |
| Zoomaric acid (C16:1n7)        | 0.478±0.012 <sup>b</sup>  | 0.476±0.003 <sup>b</sup>  | 0.716±0.002 <sup>c</sup>  | 0.706±0.002 <sup>c</sup>  | 0.123±0.004 <sup>a</sup>  |
| Heptadecanoic acid (C17:0)     | 0.282±0.008 <sup>b</sup>  | 0.304±0.005 <sup>c</sup>  | 0.344±0.002 <sup>d</sup>  | 0.368±0.001 <sup>e</sup>  | 0.194±0.004 <sup>a</sup>  |
| Stearic acid (C18:0)           | 6.389±0.097 <sup>a</sup>  | 14.166±0.009 <sup>b</sup> | 18.628±0.023 <sup>c</sup> | 24.511±0.033 <sup>d</sup> | 39.699±0.352 <sup>c</sup> |
| Elaidic acid(C18:1n9t)         | 0.657±0.015 <sup>c</sup>  | 0.609±0.019 <sup>b</sup>  | 0.895±0.006 <sup>d</sup>  | 0.863±0.013 <sup>d</sup>  | 0.210±0.015 <sup>a</sup>  |
| Oleic acid(C18:1n9c)           | 22.243±0.134 <sup>c</sup> | 16.998±0.009 <sup>d</sup> | 14.378±0.006 <sup>c</sup> | 10.825±0.009 <sup>b</sup> | 1.663±0.022 <sup>a</sup>  |
| Linoleic acid(C18:2n6c)        | 39.760±0.109 <sup>c</sup> | 28.116±0.008 <sup>d</sup> | 14.575±0.016 <sup>c</sup> | 6.071±0.012 <sup>b</sup>  | 0.144±0.006 <sup>a</sup>  |
| α-Linolenic acid(C18:3n3)      | 4.805±0.052 <sup>c</sup>  | 3.473±0.010 <sup>d</sup>  | 1.908±0.006 <sup>c</sup>  | 0.874±0.007 <sup>b</sup>  | 0.051±0.003 <sup>a</sup>  |
| Arachidic acid (C20:0)         | 0.306±0.001 <sup>a</sup>  | 0.332±0.005 <sup>bc</sup> | 0.315±0.006 <sup>ab</sup> | 0.336±0.008 <sup>c</sup>  | 0.493±0.011 <sup>d</sup>  |
| Eicosaenoic acid(C20:1)        | 0.302±0.008 <sup>d</sup>  | 0.214±0.015 <sup>c</sup>  | 0.119±0.001 <sup>b</sup>  | 0.060±0.003 <sup>a</sup>  | N.D.                      |
| Eicosadienoic acid(C20:2)      | 0.052±0.000 <sup>b</sup>  | 0.037±0.002 <sup>b</sup>  | 0.029±0.001 <sup>a</sup>  | 0.031±0.002 <sup>a</sup>  | N.D.                      |
| Eicosatrienoic acid (C20:3n6)  | 0.026±0.001 <sup>b</sup>  | 0.023±0.000 <sup>a</sup>  | 0.033±0.00 <sup>c</sup>   | 0.035±0.001 <sup>c</sup>  | N.D.                      |
| Eicosapentaenoic acid(C20:5n3) | N.D.                      | N.D.                      | 0.044±0.001 <sup>b</sup>  | 0.035±0.000 <sup>a</sup>  | N.D.                      |
| Arachidonic acid(C20:4n6)      | 0.029±0.000 <sup>a</sup>  | 0.040±0.001 <sup>b</sup>  | 0.041±0.000 <sup>b</sup>  | 0.039±0.002 <sup>b</sup>  | N.D.                      |
| Heneicosanoic acid (C21:0)     | 0.059±0.000 <sup>c</sup>  | 0.039±0.001 <sup>b</sup>  | 0.040±0.002 <sup>b</sup>  | 0.029±0.000 <sup>a</sup>  | N.D.                      |
| Docosanoic acid (C22:0)        | 0.328±0.002 <sup>d</sup>  | 0.240± 0.010 <sup>c</sup> | 0.182±0.005 <sup>b</sup>  | 0.108±0.005 <sup>a</sup>  | 0.094±0.000 <sup>c</sup>  |
| Tricosanoic acid (C23:0)       | 0.066±0.002 <sup>d</sup>  | 0.049±0.001 <sup>c</sup>  | 0.037±0.003 <sup>b</sup>  | 0.028±0.001 <sup>a</sup>  | 0.030±0.002 <sup>a</sup>  |

|                            |                           |                           |                           |                           |                           |
|----------------------------|---------------------------|---------------------------|---------------------------|---------------------------|---------------------------|
| Tetracosanoic acid (C24:0) | 0.126±0.006 <sup>c</sup>  | 0.113±0.001 <sup>d</sup>  | 0.096±0.000 <sup>c</sup>  | 0.076±0.002 <sup>a</sup>  | 0.086±0.002 <sup>b</sup>  |
| Saturated fatty acid       | 31.392±0.265 <sup>a</sup> | 49.736±0.065 <sup>b</sup> | 66.720±0.267 <sup>c</sup> | 79.995±0.135 <sup>d</sup> | 97.725±0.766 <sup>c</sup> |
| Unsaturated fatty acids    | 68.608±0.339 <sup>e</sup> | 50.264±0.067 <sup>d</sup> | 33.208±0.052 <sup>c</sup> | 20.004±0.059 <sup>b</sup> | 2.275±0.050 <sup>a</sup>  |

Results are mean ± SD (n = 3).

For each line, different letters indicate significantly different values (P < 0.05).

N.D. means not detected in sample.
